# Supplementary material
Source: PubMed Central journal article supplement (PMC4143411)
Supplement: epi-9-964-s01.pdf [file epi-9-964-s01.pdf]

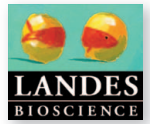

## **Supplemental Material to:**

**Amy L Non, Alexandra M Binder,  
Laura D Kubzansky, and Karin B Michels**

**Genome-wide DNA methylation in neonates exposed to  
maternal depression, anxiety, or SSRI medication during  
pregnancy**

**Epigenetics 2014; 9(7)**

**<http://dx.doi.org/10.4161/epi.28853>**

**[http://www.landesbioscience.com/journals/epigenetics/  
article/28853/](http://www.landesbioscience.com/journals/epigenetics/article/28853/)**

Table S1. CpG sites significantly different between neonates exposed to non-medicated maternal depression/anxiety and controls (FDR-adj  $p \leq 0.1$ )

| CpG Site   | Gene Name    | Beta Coefficient <sup>A</sup> | FDR-adj. p-value | Relation to CpG Island | Relation to Gene      |
|------------|--------------|-------------------------------|------------------|------------------------|-----------------------|
| cg11846236 | COL7A1       | -0.080                        | 0.031*           | Island                 | 1stExon               |
| cg25109393 | ENC1         | -0.011                        | 0.041*           | Island                 | 1stExon; 5'UTR        |
| cg10283969 | SHANK2       | 0.032                         | 0.041*           | Island                 | Body                  |
| cg21675030 | ABHD10       | -0.010                        | 0.046*           | Island                 | 1stExon               |
| cg17913386 | COL7A1       | -0.087                        | 0.046*           | Island                 | 1stExon               |
| cg01070078 | HIC1         | 0.009                         | 0.046*           | Island                 | TSS1500; 5'UTR        |
| cg24141135 | MARS         | -0.009                        | 0.046*           | Island                 | 1stExon               |
| cg20242129 | NSF          | 0.036                         | 0.046*           |                        | Body                  |
| cg04556542 | SLC24A4      | -0.015                        | 0.046*           | Island                 | Body; 5'UTR           |
| cg27180315 | SRRM3        | -0.008                        | 0.046*           | Island                 | TSS200                |
| cg01952012 | AKAP11       | 0.200                         | 0.066            |                        | 5'UTR                 |
| cg05444556 | CBFA2T3      | 0.014                         | 0.066            | N_Shelf                | Body                  |
| cg23760189 | FAM111A      | -0.009                        | 0.066            | Island                 | TSS200                |
| cg04718306 | GADD45A      | -0.009                        | 0.066            | Island                 | 5'UTR; 1stExon        |
| cg05812089 | NAV2         | -0.053                        | 0.066            | S_Shore                | TSS1500; Body         |
| cg22664157 | PWWP2B       | -0.007                        | 0.066            | Island                 | 1stExon               |
| cg15207742 | RIMS4        | -0.007                        | 0.066            | Island                 | Body                  |
| cg26740249 | TNRC6C       | -0.076                        | 0.066            | N_Shore                | 5'UTR                 |
| cg04068601 | VPS16; PTPRA | 0.030                         | 0.066            |                        | TSS200; Body          |
| cg10852662 | ZNF311       | -0.022                        | 0.066            |                        | Body                  |
| cg12599700 |              | -0.010                        | 0.066            | Island                 |                       |
| cg13654797 |              | -0.056                        | 0.066            |                        |                       |
| cg26105725 |              | 0.038                         | 0.066            |                        |                       |
| cg21516341 | NELL2        | -0.014                        | 0.070            | Island                 | Body; TSS1500; TSS200 |
| cg18869404 |              | -0.022                        | 0.070            | S_Shore                |                       |
| cg25923240 | SOX17        | -0.035                        | 0.073            | S_Shore                | 3'UTR                 |
| cg27516774 | SPG11        | -0.019                        | 0.073            | Island                 | 1stExon               |
| cg15105359 | TNS3         | -0.029                        | 0.073            | Island                 | 5'UTR                 |
| cg17858880 | TNS3         | -0.078                        | 0.077            | Island                 | 5'UTR                 |
| cg18809151 | NDUFAF1      | -0.004                        | 0.082            | Island                 | 1stExon; 5'UTR        |
| cg16223510 | BCLAF1       | -0.014                        | 0.083            | Island                 | 5'UTR                 |
| cg04115659 | PIK3AP1      | -0.010                        | 0.083            | Island                 | Body                  |
| cg02387613 | TOPBP1       | -0.008                        | 0.083            | Island                 | 5'UTR                 |
| cg22223531 | C1orf163     | -0.008                        | 0.085            | Island                 | 1stExon               |
| cg21355042 |              | -0.065                        | 0.085            |                        |                       |

|            |                 |        |       |         |               |
|------------|-----------------|--------|-------|---------|---------------|
| cg16561392 | ANKFY1          | 0.017  | 0.089 |         | Body          |
| cg13319417 | C6orf222        | -0.020 | 0.089 |         | 5'UTR         |
| cg02571678 | OCA2            | -0.036 | 0.089 | S_Shelf | Body          |
| cg10622825 | PIGC; C1orf105  | -0.025 | 0.097 | S_Shore | TSS200; Body  |
| cg17898329 |                 | -0.023 | 0.097 | N_Shore |               |
| cg00443788 | C10orf110; IDI2 | 0.022  | 0.098 |         | Body; TSS1500 |
| cg21883621 | C18orf25        | -0.006 | 0.098 | Island  | TSS200        |

<sup>A</sup>Beta coefficient represents difference in methylation level between neonates born to mothers with non-medicated maternal depression/anxiety relative to controls. All regression were adjusted for maternal age, maternal BMI, SES, and chip.

\*P-value < 0.05.

Table S2. Gene Ontology analysis for biological pathways based on top 100 differentially methylated sites among those exposed to non-medicated maternal depression/anxiety relative to controls.

| GOBPID     | Pvalue   | OddsRatio | ExpCount | Count | Size | Term                                                                                                                                               |
|------------|----------|-----------|----------|-------|------|----------------------------------------------------------------------------------------------------------------------------------------------------|
| GO:2001295 | 1.48E-05 | Inf       | 0.01     | 2     | 2    | malonyl-CoA biosynthetic process                                                                                                                   |
| GO:0008630 | 0.0007   | 19.37     | 0.17     | 3     | 45   | intrinsic apoptotic signaling pathway in response to DNA damage                                                                                    |
| GO:0034030 | 0.0010   | 53.27     | 0.05     | 2     | 12   | ribonucleoside bisphosphate biosynthetic process                                                                                                   |
| GO:0034033 | 0.0010   | 53.27     | 0.05     | 2     | 12   | purine nucleoside bisphosphate biosynthetic process                                                                                                |
| GO:0015936 | 0.0015   | 40.97     | 0.06     | 2     | 15   | coenzyme A metabolic process                                                                                                                       |
| GO:0009892 | 0.0018   | 2.94      | 5.33     | 13    | 1371 | negative <b>regulation</b> of metabolic process                                                                                                    |
| GO:0010558 | 0.0021   | 3.33      | 3.49     | 10    | 899  | negative <b>regulation</b> of macromolecule biosynthetic process                                                                                   |
| GO:0045892 | 0.0025   | 3.48      | 2.97     | 9     | 765  | negative <b>regulation</b> of transcription, DNA-dependent                                                                                         |
| GO:0031327 | 0.0029   | 3.19      | 3.64     | 10    | 936  | negative <b>regulation</b> of cellular biosynthetic process                                                                                        |
| GO:0001828 | 0.0039   | Inf       | 0.00     | 1     | 1    | inner cell mass cellular morphogenesis                                                                                                             |
| GO:0003142 | 0.0039   | Inf       | 0.00     | 1     | 1    | cardiogenic plate morphogenesis                                                                                                                    |
| GO:0010793 | 0.0039   | Inf       | 0.00     | 1     | 1    | <b>regulation</b> of mRNA export from nucleus                                                                                                      |
| GO:0015700 | 0.0039   | Inf       | 0.00     | 1     | 1    | arsenite transport                                                                                                                                 |
| GO:0015828 | 0.0039   | Inf       | 0.00     | 1     | 1    | tyrosine transport                                                                                                                                 |
| GO:0019391 | 0.0039   | Inf       | 0.00     | 1     | 1    | glucuronoside catabolic process                                                                                                                    |
| GO:0032938 | 0.0039   | Inf       | 0.00     | 1     | 1    | negative <b>regulation</b> of translation in response to oxidative stress                                                                          |
| GO:0043990 | 0.0039   | Inf       | 0.00     | 1     | 1    | histone H2A-S1 phosphorylation                                                                                                                     |
| GO:0045299 | 0.0039   | Inf       | 0.00     | 1     | 1    | otolith mineralization                                                                                                                             |
| GO:0051089 | 0.0039   | Inf       | 0.00     | 1     | 1    | constitutive protein ectodomain proteolysis                                                                                                        |
| GO:0060807 | 0.0039   | Inf       | 0.00     | 1     | 1    | <b>regulation</b> of transcription from RNA polymerase II promoter involved in definitive endodermal cell fate specification                       |
| GO:1900477 | 0.0039   | Inf       | 0.00     | 1     | 1    | negative <b>regulation</b> of G1/S transition of mitotic cell cycle by negative <b>regulation</b> of transcription from RNA polymerase II promoter |
| GO:0006084 | 0.0042   | 23.14     | 0.10     | 2     | 25   | acetyl-CoA metabolic process                                                                                                                       |
| GO:0046129 | 0.0047   | 9.65      | 0.34     | 3     | 87   | purine ribonucleoside biosynthetic process                                                                                                         |
| GO:0033865 | 0.0052   | 20.46     | 0.11     | 2     | 28   | nucleoside bisphosphate metabolic process                                                                                                          |

|            |        |        |      |   |     |                                                                                |
|------------|--------|--------|------|---|-----|--------------------------------------------------------------------------------|
| GO:0045934 | 0.0058 | 3.03   | 3.38 | 9 | 870 | negative <b>regulation</b> of nucleobase-containing compound metabolic process |
| GO:1900117 | 0.0064 | 5.86   | 0.74 | 4 | 191 | <b>regulation</b> of execution phase of apoptosis                              |
| GO:2001235 | 0.0072 | 17.16  | 0.13 | 2 | 33  | positive <b>regulation</b> of apoptotic signaling pathway                      |
| GO:0010212 | 0.0073 | 8.18   | 0.40 | 3 | 102 | response to ionizing radiation                                                 |
| GO:0070271 | 0.0077 | 3.10   | 2.90 | 8 | 746 | protein complex biogenesis                                                     |
| GO:0006431 | 0.0078 | 261.31 | 0.01 | 1 | 2   | methionyl-tRNA aminoacylation                                                  |
| GO:0007493 | 0.0078 | 261.31 | 0.01 | 1 | 2   | endodermal cell fate determination                                             |
| GO:0043987 | 0.0078 | 261.31 | 0.01 | 1 | 2   | histone H3-S10 phosphorylation                                                 |
| GO:0043988 | 0.0078 | 261.31 | 0.01 | 1 | 2   | histone H3-S28 phosphorylation                                                 |
| GO:0048866 | 0.0078 | 261.31 | 0.01 | 1 | 2   | stem cell fate specification                                                   |
| GO:1900041 | 0.0078 | 261.31 | 0.01 | 1 | 2   | negative <b>regulation</b> of interleukin-2 secretion                          |
| GO:2000035 | 0.0078 | 261.31 | 0.01 | 1 | 2   | <b>regulation</b> of stem cell division                                        |
| GO:0006812 | 0.0079 | 3.36   | 2.32 | 7 | 609 | cation transport                                                               |
| GO:0009163 | 0.0087 | 7.64   | 0.42 | 3 | 109 | nucleoside biosynthetic process                                                |
| GO:0065003 | 0.0091 | 2.81   | 3.63 | 9 | 933 | macromolecular complex assembly                                                |

---

Only includes terms with p-value<0.01.

Table S3. Robust SE regressions results for selected candidate genes.

| Candidate Genes                          | Non-medicated depression/anxiety exposure beta coefficient (95% CI) | Non-medicated depression/anxiety unadjusted p-value | SSRI exposure beta coefficient (95% CI) | SSRI exposure unadjusted p-value | Gene Region      | Relation to CpG Island | Probe Type |
|------------------------------------------|---------------------------------------------------------------------|-----------------------------------------------------|-----------------------------------------|----------------------------------|------------------|------------------------|------------|
| <b>Stress/Behavior-related</b>           |                                                                     |                                                     |                                         |                                  |                  |                        |            |
| <i>BDNF</i><br>(96 probes;<br>p<0.0005)  | --                                                                  | --                                                  | --                                      | --                               | --               | --                     |            |
| <i>FKBP5</i><br>(34 probes;<br>p< 0.001) |                                                                     |                                                     |                                         |                                  |                  |                        |            |
| cg18726036                               | 0.009<br>(0.004, 0.01)                                              | 0.0017 <sup>‡</sup>                                 | --                                      | --                               | 3'UTR            | --                     | I          |
| cg07061368                               | --                                                                  | --                                                  | -0.03<br>(-0.05, -0.01)                 | 0.004 <sup>‡</sup>               | 5'UTR            | --                     | II         |
| <i>NR3C1</i><br>(39 probes;<br>p<0.001)  |                                                                     |                                                     |                                         |                                  |                  |                        |            |
| cg00629244                               | -0.006<br>(-0.01, -0.003)                                           | 0.0019 <sup>‡</sup>                                 | --                                      | --                               | TSS200;<br>5'UTR | Island                 | I          |
| <i>SLC6A4</i><br>(16 probes;<br>p<0.003) |                                                                     |                                                     |                                         |                                  |                  |                        |            |
| cg10901968                               | --                                                                  | --                                                  | -0.007<br>(-0.01, -0.003)               | 9.9x10 <sup>-4</sup> *           | TSS200           | Island                 | I          |
| <i>CRHR1</i><br>(23 probes,<br>p<0.002)  |                                                                     |                                                     |                                         |                                  |                  |                        |            |

|                                            |                           |                     |                         |                        |              |         |    |
|--------------------------------------------|---------------------------|---------------------|-------------------------|------------------------|--------------|---------|----|
| cg11731737                                 | -0.005<br>(-0.01, -0.002) | 0.0023 <sup>¥</sup> | --                      | --                     | Body         | Island  | I  |
| <i>CRHR2</i><br>(17 probes;<br>p<0.003)    | --                        | --                  | --                      | --                     | --           | --      | -- |
| <i>NFKB1</i><br>(19 probes;<br>p<0.003)    | --                        | --                  | --                      | --                     | --           | --      | -- |
| <i>NKFB2</i><br>(27 probes;<br>p<0.002)    | --                        | --                  | --                      | --                     | --           | --      | -- |
| cg23606922                                 | -0.007<br>(-0.01, -0.003) | 0.0018*             | -0.01<br>(-0.02, -0.01) | 2.6x10 <sup>-5</sup> * | 5'UTR;TSS200 | Island  | I  |
| <b>Epigenetic<br/>Regulator<br/>Genes</b>  |                           |                     |                         |                        |              |         |    |
| <i>DNMT1</i><br>(20 probes,<br>p<0.003)    | --                        | --                  | --                      | --                     | --           | --      | -- |
| <i>DNMT3a</i><br>(132 probes;<br>p<0.0004) | --                        | --                  | 0.008<br>(0.004, 0.01)  | 8x10 <sup>-4</sup> ¥   | Body         | N_Shore | I  |

\*Indicates significantly associated sites, ¥ indicates marginally significant sites, after Bonferroni adjustment for the number of probes on microarray related to each gene of interest. Beta coefficients and p-values are listed only for probes with significant associations. Beta coefficients represent change in percent methylation. All regression were adjusted for maternal age, maternal BMI, SES, and chip.

Supp. Table 4. Pyrosequencing Primer information.

| <b>Gene</b>                                          | <b>Chromosome location (build hg19)</b>       | <b>Amplicon length</b> | <b>Primer Type</b>                    | <b>Primer sequence (5'→3')</b>              |
|------------------------------------------------------|-----------------------------------------------|------------------------|---------------------------------------|---------------------------------------------|
| Col7a1                                               | 3p21.31<br><br>chr3:48,632,55<br>4-48,632,588 | 193 bps                | Forward                               | GGTGTTGGGGATGAAGGT                          |
|                                                      |                                               |                        | Reverse                               | 5' Biotin-<br>CCTAACTAACCACTTTTACTACCTAAAAT |
|                                                      |                                               |                        | Sequencing                            | GGGGAGTTTTTGTAGGAT                          |
|                                                      |                                               |                        | Unconverted<br>Sequence to<br>analyze | CCCGGCGCAGAGCGCGGCCACCAGAAGCC<br>GCAGCG     |
| Converted<br>Sequence to<br>analyze ('-<br>' strand) | TTYGGYGTAGAGYGYGGTTATTAGAAGTY<br>GTAGY        |                        |                                       |                                             |

\* Chromosomal location is based on the UCSC Human Feb. 2009 (GRCh37/hg19) Build



Supp Figures:

Figure S1. Normalization

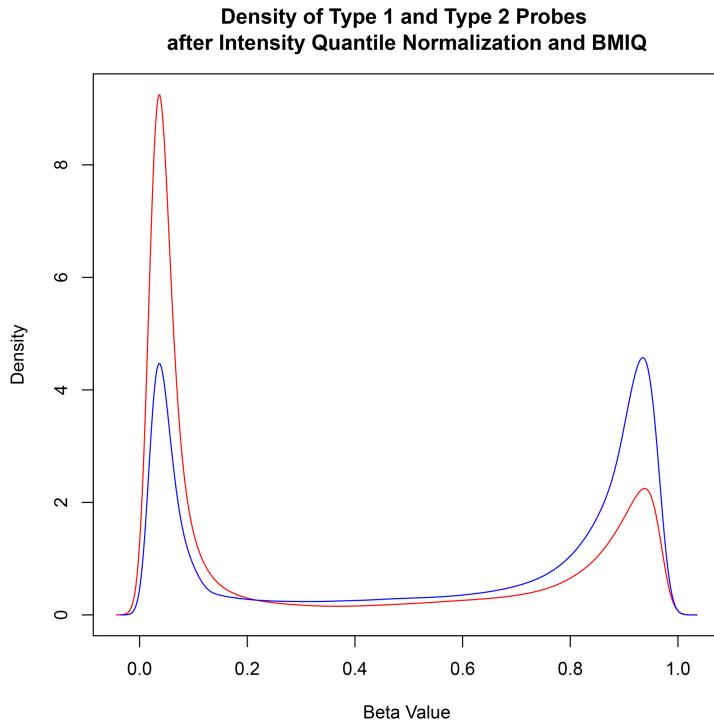

Figure S2 Correlations between replicate quality control and cord blood samples.

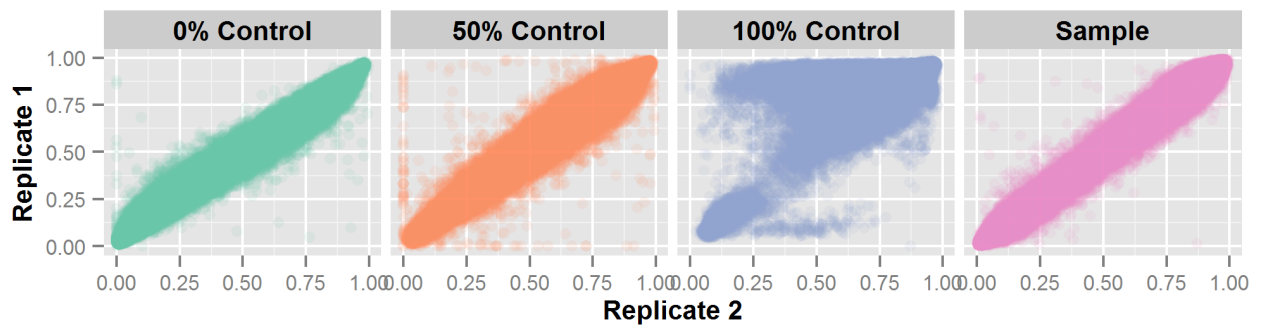

Figure S3. Density of DNA Methylation for replicate quality control samples and cord blood sample.

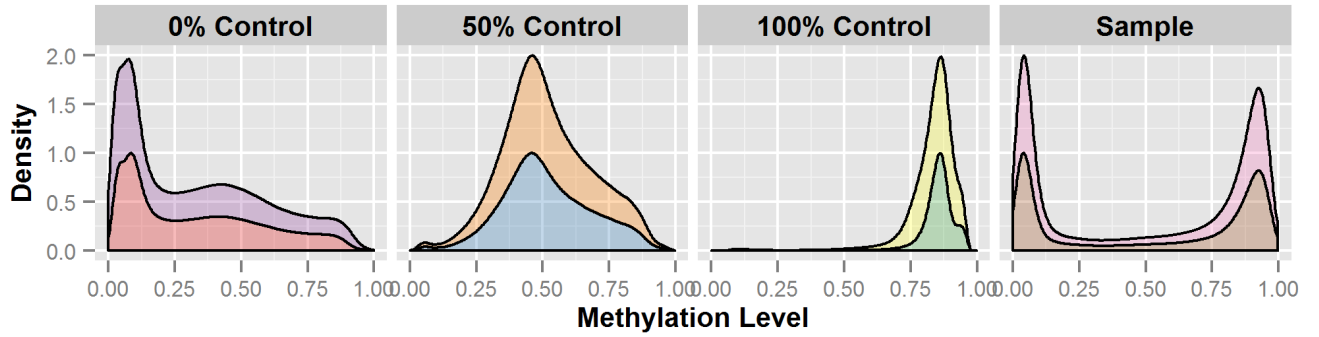

Figure S4. Principle Component Plot to identify outliers

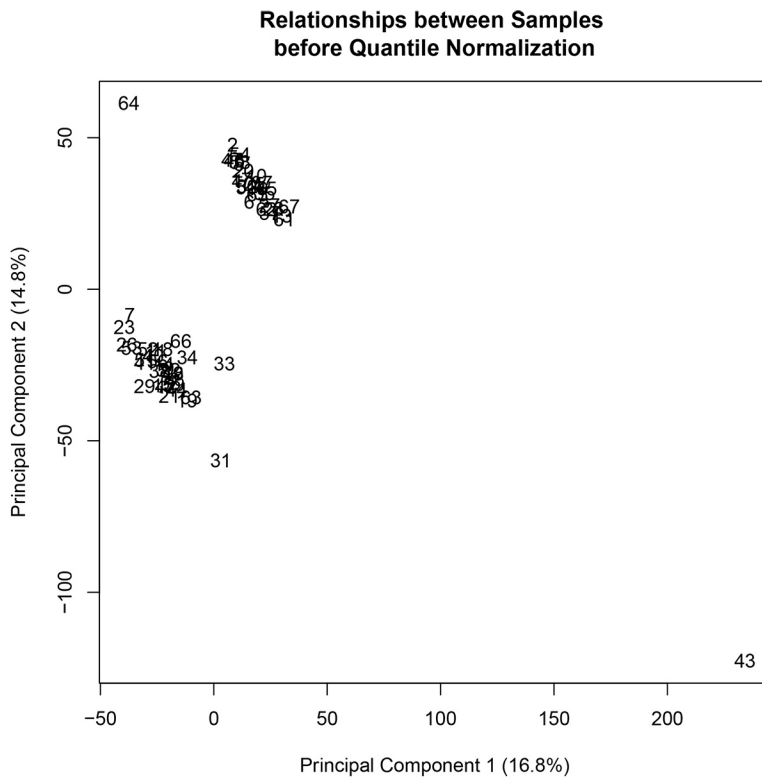

## Supplemental Methods

### *Quality Control of Microarray Data*

Data were assembled at the USC Epigenome Center by converting fluorescence intensities from methylated (M) and unmethylated (U) alleles to methylation level, ranging from 0-1, given by  $\text{Beta} = M / (M + U + 100)$ . For sites where signal intensity was not significantly different from background measurements (detection p value > 0.01), the beta value was recorded as “NA” and excluded from all analyses. Additionally, 65 CpG sites identified by Illumina as SNPS were removed. Color bias adjustment and quantile normalization (QN) were performed on signal intensities using the “lumi” Bioconductor package.<sup>48</sup> Adjustment for probe-type bias was conducted on QN data using beta-mixture quantile normalization (BMIQ) on  $\beta$ -values using the “wateRmelon” Bioconductor package.<sup>49, 50</sup> The density plot of methylation values for Type 1 and Type 2 probes following quantile normalization can be seen in Figure S1. To avoid areas of high methylation on the inactive X chromosome, statistical analyses were restricted to autosomal CpGs with unique probe target sequences reducing the data set after normalization to 472,487 probes. Non-specific probe sites were identified and removed from analysis if the probe had multiple DNA target sequences with at least 40 matching bases, at least 90% identity, end-nucleotide match, and gapless sequence alignment, as identified by BLAT analysis tested against both strands of the full bisulfite converted and non-converted human genome (build 19), following methods of Chen et al.<sup>51</sup> This resulted in the removal of an additional 18,630 non-specific probes, resulting in a final sample size of 453,857 probes. The 0, 50, 100% methylation control samples were not

included in the inter-sample normalizing steps due to expected differences in methylation distribution. These control samples were only background corrected.

Reproducibility on the array was assessed among one pair of technical replicate cord blood samples and three sets of quality control samples (0, 50, 100% methylation) by randomly sampling 100 loci 10,000 times and calculating Pearson correlations on each set. In general, the median correlation was extremely high for the control samples ( $r > 0.98$ ), with the exception of the 100% control samples. Between cord blood technical replicates, the median correlation was very strong ( $r > 0.99$ ). Correlation plots for all sites in the replicate samples can be seen in Figure S2. The distribution of DNA methylation levels for duplicate control samples are shown in Figure S3. Possible outliers were explored by inspecting overall signal intensity, distribution of M-values, number of detected sites, and the relationship between samples after hierarchical clustering and multidimensional scaling. One extreme outlier was detected and removed from subsequent analyses (Figure S4, sample 43). The outlier did not differ in maternal age, BMI, race, or any measured characteristics from other samples in the dataset. A final quality control analysis was performed by testing if each neonate sample clustered with the expected sex, as identified in labor and delivery charts. Multiple dimensional scaling analyses, PCAs, and heatmaps were created using probes from the X and Y chromosomes (data not shown). All three analyses consistently identified one individual as clustering with the opposite of the expected sex. The finding of only one misclassified sample likely indicated an error in recording the gender, rather than sample mix-up. This individual was excluded from subsequent analyses.

## Pyroverification of Microarray Results

Pyrosequencing was performed on 6 CpG sites in the *Col7a1* gene, which contained two sites identified as significant in the site-by-site analysis. Genomic DNA was bisulfite treated in duplicate on every sample using the EZ DNA Methylation Gold Kit (Zymo Research, CA), according to manufacturer's protocol. Pyrosequencing primers (Table S4) were designed using PyroMark Assay Design Software 2.0 ([www.qiagen.com](http://www.qiagen.com)). Bisulfite-converted DNA was mixed with 0.2uM of each primer and amplified using the HotstarTaq plus Master Mix (Qiagen). A bisulfite conversion check was included in the assay to verify full conversion of the DNA. Methylation levels for all CpG sites were assessed using the Pyromark Q24 pyrosequencer (Qiagen). The assay was validated with a methylation scale (0%, 20%, 40%, 60%, >80%) in duplicate created from whole genome amplified DNA (representing 0% methylation), and DNA treated with CpG methyltransferase *M.SssI* (representing >80% methylation). For each sample, PCRs were performed on each of the duplicate bisulfite treatments. If the difference between two replicates exceeded two standard deviations of the variation in the entire study population, a third bisulfite treatment was tested and the average of the two closest results was used.
